# Supplementary material
Source: MDPI journal article supplement (https://www.mdpi.com/2313-0105/10/2/46)
Supplement: s1 [file s1]

## Supporting Information

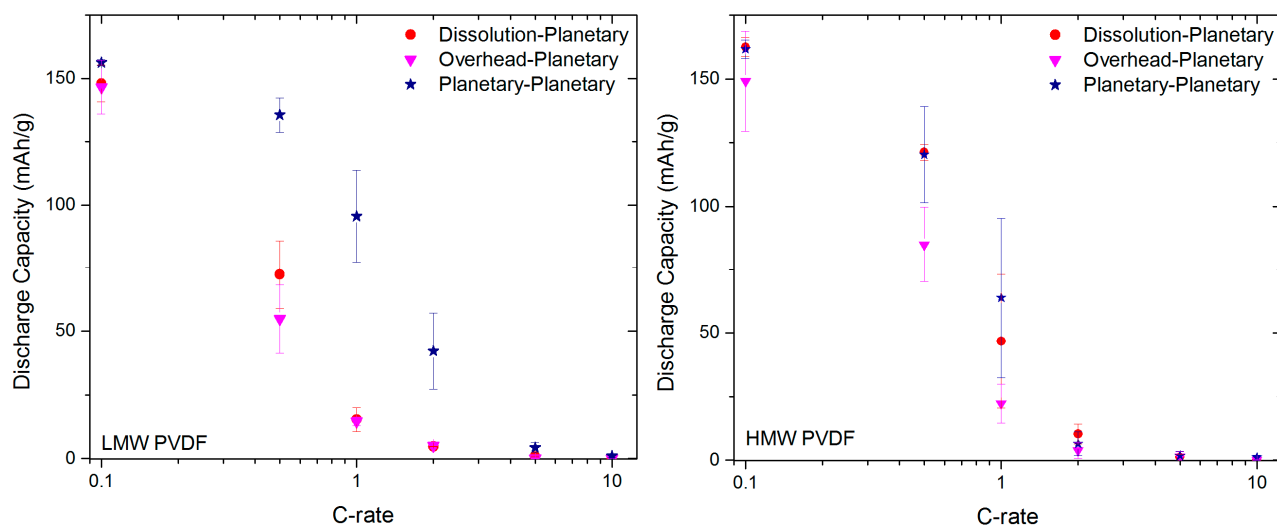

Figure S1 Rate capability for electrodes made from each of the six slurries discussed in Figure 5. Rate capacity in the form of semi-log Peukert plots for (left) LMW electrodes and (right) HMW electrodes. Error bars represent one standard deviation.

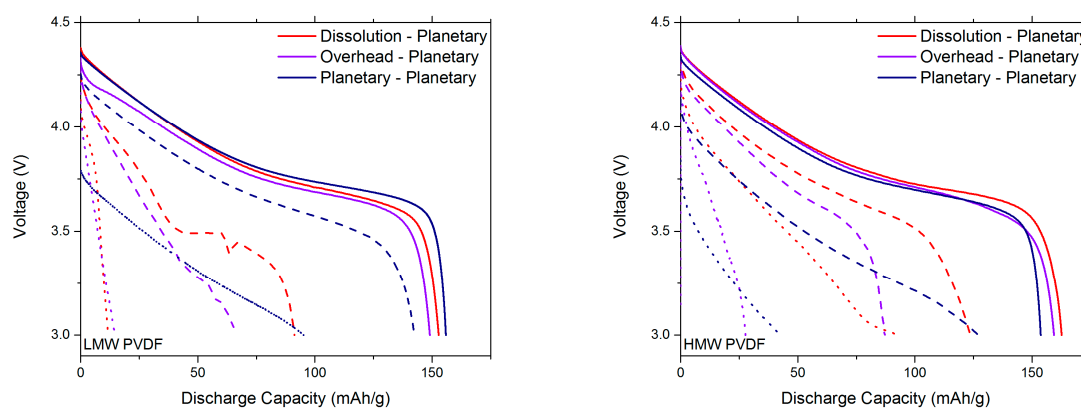

Figure S2 Representative discharges curves for each of the six slurries discussed in Figure 5. (a) LMW (b) HMW. Solid lines represents C/10, dashed lines represents C/2 and dots represents 1C.
